# Supplementary material for: Symmetry‐breaking in branching epithelia: cells on micro‐patterns under flow challenge the hypothesis of positive feedback by a secreted autocrine inhibitor of motility
Source: PubMed Central journal article supplement (PMC5442143; doi:10.1111/joa.12599), 2017-03-29
Supplement: JOA-230-766-s001.pdf [file JOA-230-766-s001.pdf]

**Figure S1:** data plotted in the graphs in Fig 1., Fig 4 and 5.

**Data used in Fig 1:**

**Micropattern segment curvature measurements ( $\mu\text{m}^{-1}$ ).**

| Segment | C1      | C2      | C3      | F1 | F2 | V1     | V2    | V3    |
|---------|---------|---------|---------|----|----|--------|-------|-------|
| N       | 10      | 10      | 10      | 10 | 10 | 10     | 10    | 10    |
| Mean    | -0.021  | -0.008  | -0.007  | 0  | 0  | 0.012  | 0.05  | 0.052 |
| SD      | 0.007   | 0.003   | 0.003   | 0  | 0  | 0.0004 | 0.01  | 0.006 |
| Median  | -0.022  | -0.0073 | -0.0070 | 0  | 0  | 0.012  | 0.048 | 0.051 |
| IQR     | 0.007   | 0.004   | 0.0037  | 0  | 0  | 0.001  | 0.014 | 0.011 |
| Min     | -0.030  | -0.013  | -0.013  | 0  | 0  | 0.012  | 0.032 | 0.042 |
| LQ      | -0.026  | -0.010  | -0.0094 | 0  | 0  | 0.012  | 0.038 | 0.047 |
| UQ      | -0.018  | -0.0064 | -0.0058 | 0  | 0  | 0.013  | 0.052 | 0.057 |
| Max     | -0.0054 | -0.0035 | -0.0028 | 0  | 0  | 0.013  | 0.063 | 0.060 |

**Micropattern segment length measurements ( $\mu\text{m}$ ).**

| Segment | C1 | C2 | C3 | F1  | F2 | V1  | V2 | V3 |
|---------|----|----|----|-----|----|-----|----|----|
| N       | 10 | 10 | 10 | 10  | 10 | 10  | 10 | 10 |
| Mean    | 32 | 73 | 81 | 100 | 84 | 324 | 33 | 50 |
| SD      | 4  | 9  | 10 | 7   | 5  | 6   | 3  | 5  |
| Median  | 32 | 75 | 82 | 100 | 82 | 324 | 35 | 50 |
| IQR     | 5  | 14 | 12 | 9   | 6  | 5   | 5  | 3  |
| Min     | 25 | 60 | 60 | 89  | 79 | 315 | 28 | 41 |
| LQ      | 31 | 66 | 77 | 95  | 81 | 321 | 31 | 49 |
| UQ      | 36 | 80 | 89 | 104 | 87 | 326 | 36 | 52 |
| Max     | 37 | 86 | 92 | 109 | 93 | 335 | 36 | 61 |

**Data used in Fig. 4:**

**Protrusion rates for each segment.**

| Segment | C1    | C2     | C3     | F1     | F2     | V1     | V2    | V3    |
|---------|-------|--------|--------|--------|--------|--------|-------|-------|
| N       | 516   | 508    | 496    | 507    | 483    | 522    | 532   | 549   |
| Mean    | 0.005 | 0.0035 | 0.0029 | 0.0051 | 0.0052 | 0.0096 | 0.016 | 0.021 |
| SD      | 0.012 | 0.0064 | 0.0057 | 0.0079 | 0.0081 | 0.0064 | 0.017 | 0.015 |
| Median  | 0     | 0      | 0      | 0      | 0      | 0.0093 | 0.028 | 0.02  |
| IQR     | 0     | 0      | 0      | 0.01   | 0.012  | 0.012  | 0.028 | 0.04  |
| Min     | 0     | 0      | 0      | 0      | 0      | 0      | 0     | 0     |
| LQ      | 0     | 0      | 0      | 0      | 0      | 0.0031 | 0     | 0     |
| UQ      | 0     | 0      | 0      | 0.01   | 0.012  | 0.015  | 0.028 | 0.04  |
| Max     | 0.063 | 0.027  | 0.024  | 0.04   | 0.036  | 0.028  | 0.057 | 0.06  |
| Mode    | 0     | 0      | 0      | 0      | 0      | 0.012  | 0     | 0.02  |

(please note that the above table is raw data, not normalized for segment length)

**Change in protrusion rate with curvature.**

| Segments | Means diff. | MW p-value | Ratio | 95% CIL | 95% CIU | RR p-value |
|----------|-------------|------------|-------|---------|---------|------------|
| C1-C2    | -0.0015     | 0.0380*    | 0.69  | 0.52    | 0.92    | 0.0121*    |
| C2-C3    | -0.0006     | 0.0112*    | 0.83  | 0.64    | 1.07    | 0.1645     |
| C3-F1    | 0.0022      | 0.0001***  | 1.76  | 1.41    | 2.20    | 0.0000***  |
| F1-F2    | 0.0001      | 0.3106     | 1.02  | 0.85    | 1.23    | 0.8583     |
| F2-V1    | 0.0044      | 0.0000***  | 1.84  | 1.59    | 2.14    | 0.0000***  |
| V1-V2    | 0.0064      | 0.0052**   | 1.68  | 1.48    | 1.90    | 0.0000***  |
| V2-V3    | 0.0050      | 0.0003***  | 1.29  | 1.12    | 1.49    | 0.0003***  |

(please note that the above table is from the normalized data)

Data used in Fig. 5:

**Protrusion rates under flow conditions.**

| Segment | Flow | N   | Mean   | 95% CIL | 95% CIU | SEM    |
|---------|------|-----|--------|---------|---------|--------|
| C1      | (-)  | 516 | 0.0050 | 0.0039  | 0.0060  | 0.0005 |
| C1      | (+)  | 518 | 0.0056 | 0.0046  | 0.0067  | 0.0006 |
| C2      | (-)  | 508 | 0.0035 | 0.0030  | 0.0041  | 0.0003 |
| C2      | (+)  | 517 | 0.0033 | 0.0028  | 0.0038  | 0.0003 |
| C3      | (-)  | 496 | 0.0029 | 0.0024  | 0.0034  | 0.0003 |
| C3      | (+)  | 534 | 0.0036 | 0.0031  | 0.0041  | 0.0003 |
| F1      | (-)  | 507 | 0.0051 | 0.0044  | 0.0058  | 0.0003 |
| F1      | (+)  | 506 | 0.0064 | 0.0057  | 0.0072  | 0.0004 |
| F2      | (-)  | 483 | 0.0052 | 0.0044  | 0.0059  | 0.0004 |
| F2      | (+)  | 502 | 0.0072 | 0.0064  | 0.0081  | 0.0004 |
| V1      | (-)  | 522 | 0.0096 | 0.0090  | 0.0102  | 0.0003 |
| V1      | (+)  | 562 | 0.0101 | 0.0095  | 0.0106  | 0.0003 |
| V2      | (-)  | 532 | 0.0161 | 0.0146  | 0.0176  | 0.0007 |
| V2      | (+)  | 540 | 0.0155 | 0.0141  | 0.0168  | 0.0007 |
| V3      | (-)  | 549 | 0.0209 | 0.0196  | 0.0221  | 0.0006 |
| V3      | (+)  | 562 | 0.0181 | 0.0167  | 0.0194  | 0.0007 |

**Change in protrusion rates in response to flow conditions.**

| Segment | Means diff. | MW p-value | Ratio | 95% CIL | 95% CIU | RR p-value |
|---------|-------------|------------|-------|---------|---------|------------|
| C1      | 0.0006      | 0.4588     | 1.12  | 0.82    | 1.52    | 0.5115     |
| C2      | -0.0002     | 0.7373     | 0.95  | 0.74    | 1.22    | 0.7431     |
| C3      | 0.0007      | 0.0413*    | 1.24  | 0.97    | 1.59    | 0.0821     |
| F1      | 0.0013      | 0.0178*    | 1.26  | 1.07    | 1.49    | 0.0059**   |
| F2      | 0.0020      | 0.0011**   | 1.39  | 1.16    | 1.66    | 0.0003***  |
| V1      | 0.0005      | 0.2423     | 1.05  | 0.98    | 1.12    | 0.1466     |
| V2      | -0.0007     | 0.5851     | 0.96  | 0.81    | 1.13    | 0.6392     |
| V3      | -0.0028     | 0.0033**   | 0.87  | 0.77    | 0.98    | 0.0200*    |
