# Supplementary material for: Symmetry‐breaking in branching epithelia: cells on micro‐patterns under flow challenge the hypothesis of positive feedback by a secreted autocrine inhibitor of motility
Source: PubMed Central journal article supplement (PMC5442143; doi:10.1111/joa.12599), 2017-03-29

**Figure S2:** Protrusion frequency per segment;  $N$ =number of segments analyzed,  $\mu$ =mean,  $\sigma^2$ =variance: the predicted Poisson distribution is shown in red. Box plots show cell counts along the edge of each segment (taken from a representative sample of 10 micro-patterns)..

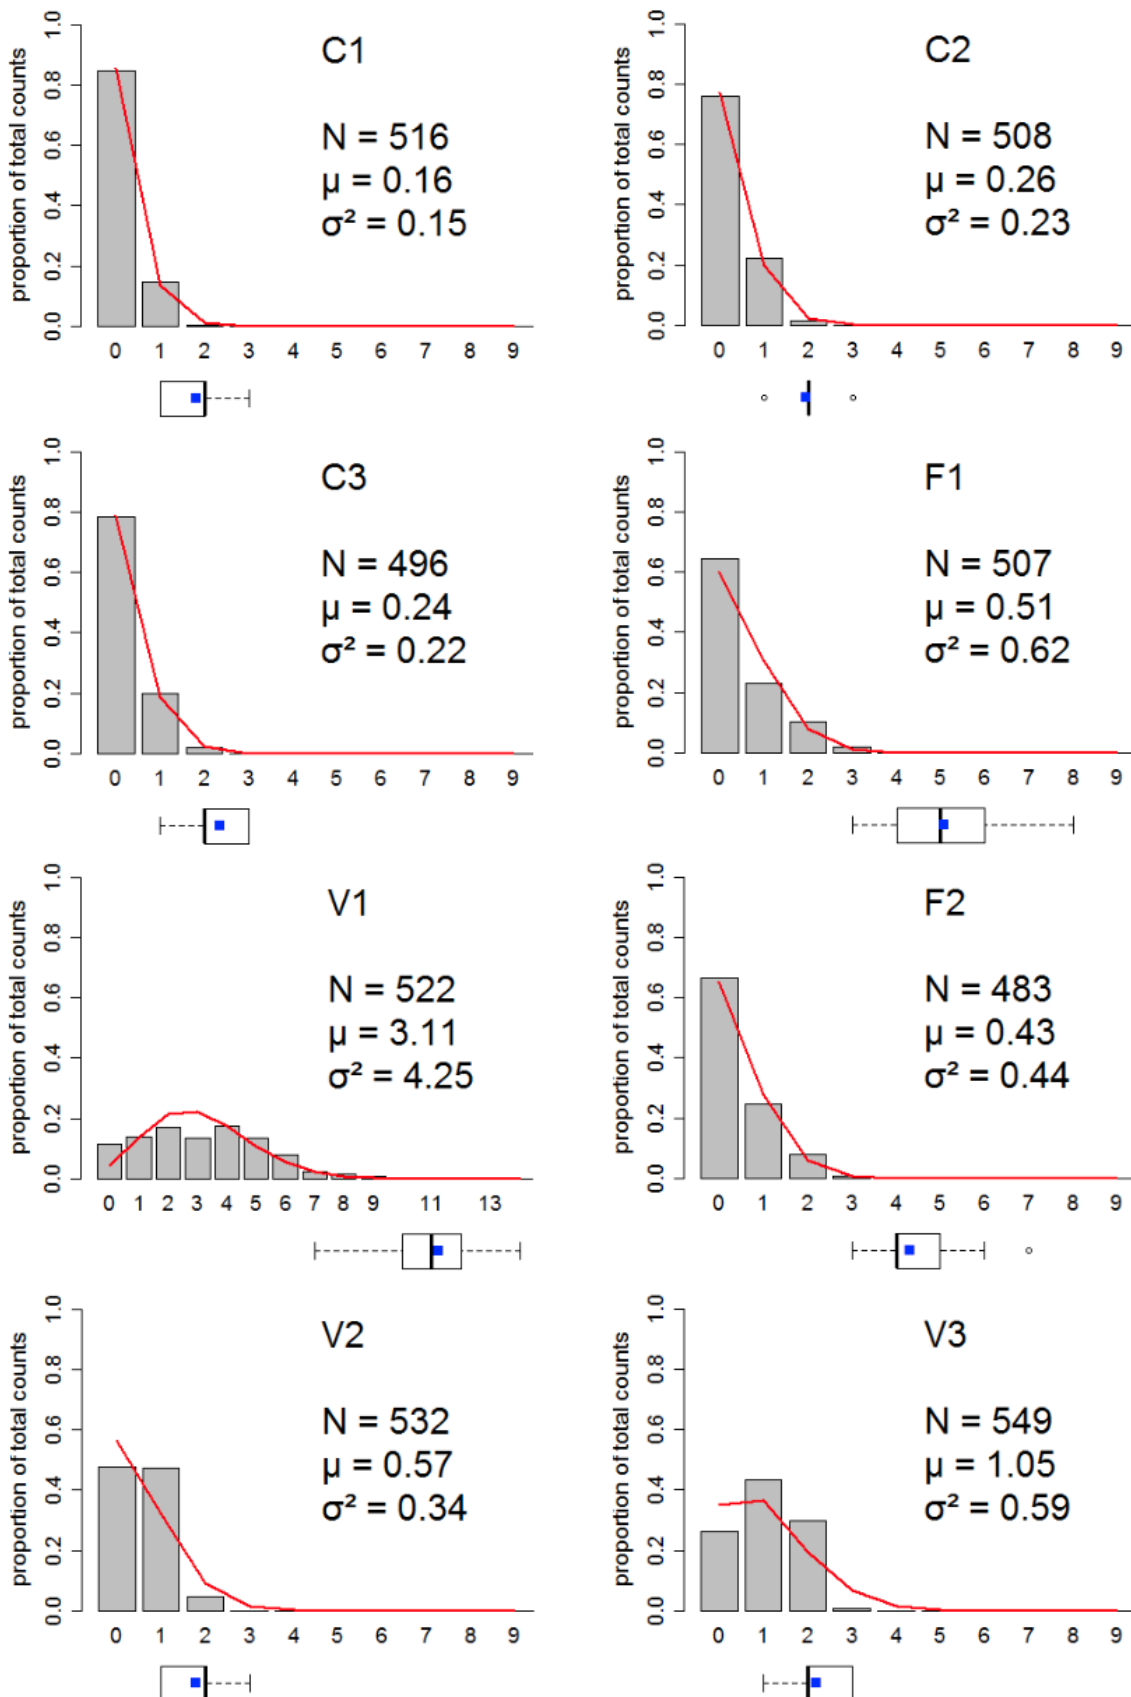

Supplement: JOA-230-766-s002.pdf [file JOA-230-766-s002.pdf]
